# Supplementary material
Source: PubMed Central journal article supplement (PMC3376490)
Supplement: mmc1.pdf [file mmc1.pdf]

## Supplemental Data

### Exome Sequencing Identifies Autosomal-Dominant

### SRP72 Mutations Associated with Familial Aplasia

### and Myelodysplasia

Michael Kirwan, Amanda J. Walne, Vincent Plagnol, Mark Velangi,

Aloysius Ho, Upal Hossain, Tom Vulliamy, and Inderjeet Dokal

**Table S1. The 107 Exome Variations Shared by All Affected Members of Family 1**

| Chr | Nucleotide Position | Reference Base | Sample Base | Variation Effect | AA WT | AA Var | Protein Position | Gene            | MIM    | Follow-Up |
|-----|---------------------|----------------|-------------|------------------|-------|--------|------------------|-----------------|--------|-----------|
| 1   | 12776677            | T              | A           | nonsense         | LEU   | stop   | 105/475          | <i>PRAMEF1</i>  | na     | NL        |
| 1   | 12923773            | C              | T           | missense         | CYS   | TYR    | 166/477          | <i>PRAMEF6</i>  | na     | NL        |
| 1   | 12959174            | C              | T           | missense         | PRO   | LEU    | 220/482          | <i>PRAMEF22</i> | na     | NL        |
| 1   | 52931112            | A              | C           | missense         | VAL   | GLY    | 41/232           | <i>C1orf163</i> | na     | NL        |
| 1   | 108095298           | C              | T           | missense         | ARG   | GLN    | 408/848          | <i>VAV3</i>     | 605541 | EVS       |
| 1   | 143663577           | C              | T           | missense         | ALA   | THR    | 167/174          | <i>PDE4DIP</i>  | 608117 | NL        |
| 1   | 150543001           | C              | G           | missense         | SER   | THR    | 3662/4062        | <i>FLG</i>      | 135940 | NL        |
| 1   | 150543083           | C              | T           | missense         | ASP   | ASN    | 3635/4062        | <i>FLG</i>      | 135940 | NL        |
| 1   | 150544178           | G              | A           | missense         | ARG   | CYS    | 3270/4062        | <i>FLG</i>      | 135940 | NL        |
| 1   | 150545179           | T              | C           | missense         | ASP   | GLY    | 2936/4062        | <i>FLG</i>      | 135940 | NL        |
| 1   | 150546353           | C              | T           | missense         | GLY   | ARG    | 2545/4062        | <i>FLG</i>      | 135940 | NL        |
| 1   | 150546656           | T              | C           | missense         | LYS   | GLU    | 2444/4062        | <i>FLG</i>      | 135940 | NL        |
| 1   | 150546794           | C              | G           | missense         | GLU   | GLN    | 2398/4062        | <i>FLG</i>      | 135940 | NL        |
| 1   | 150547095           | C              | G           | missense         | GLU   | ASP    | 2297/4062        | <i>FLG</i>      | 135940 | NL        |
| 1   | 150547941           | G              | T           | missense         | ASP   | GLU    | 2015/4062        | <i>FLG</i>      | 135940 | NL        |
| 1   | 150548369           | G              | T           | missense         | GLN   | LYS    | 1873/4062        | <i>FLG</i>      | 135940 | NL        |
| 1   | 150549534           | G              | C           | missense         | ASP   | GLU    | 1484/4062        | <i>FLG</i>      | 135940 | NL        |
| 1   | 150551723           | C              | T           | missense         | GLU   | LYS    | 755/4062         | <i>FLG</i>      | 135940 | NL        |
| 1   | 150551805           | G              | T           | missense         | HIS   | GLN    | 727/4062         | <i>FLG</i>      | 135940 | NL        |
| 1   | 151066748           | G              | T           | missense         | GLY   | VAL    | 59/111           | <i>LCE1A</i>    | 612603 | NL        |
| 1   | 156070884           | G              | A           | missense         | PRO   | SER    | 219/348          | <i>CD5L</i>     | 602592 | NL        |
| 1   | 156072297           | C              | A           | nonsense         | GLU   | stop   | 110/348          | <i>CD5L</i>     | 602592 | NL        |
| 1   | 184543711           | G              | C           | missense         | CYS   | SER    | 746/1405         | <i>PRG4</i>     | 604283 | NL        |
| 1   | 246291192           | G              | T           | missense         | GLY   | CYS    | 196/313          | <i>OR2L13</i>   | na     | NL        |
| 1   | 246703738           | T              | C           | missense         | VAL   | ALA    | 155/319          | <i>OR2T3</i>    | na     | NL        |
| 1   | 246704166           | C              | T           | missense         | ARG   | CYS    | 298/319          | <i>OR2T3</i>    | na     | NL        |
| 1   | 246803882           | C              | G           | missense         | ARG   | PRO    | 267/319          | <i>OR2T34</i>   | na     | NL        |
| 1   | 246868215           | C              | T           | missense         | GLY   | ASP    | 323/324          | <i>OR2T35</i>   | na     | NL        |

| Chr | Nucleotide Position | Reference Base | Sample Base | Variation Effect | AA WT | AA Var   | Protein Position | Gene      | MIM    | Follow-Up |
|-----|---------------------|----------------|-------------|------------------|-------|----------|------------------|-----------|--------|-----------|
| 2   | 108642531           | G              | A           | missense         | ARG   | HIS      | 12/326           | LIMS1     | 602567 | NL        |
| 2   | 112330900           | G              | A           | nonsense         | GLN   | stop     | 465/1945         | ANAPC1    | 608473 | NL        |
| 2   | 130616274           | T              | C           | missense         | HIS   | ARG      | 149/381          | CCDC74B   | na     | NL        |
| 2   | 135606966           | C              | G           | missense         | PRO   | ARG      | 423/982          | RAB3GAP1  | 602536 | REPORT    |
| 2   | 140830464           | G              | A           | missense         | ALA   | VAL      | 3816/4600        | LRP1B     | 608766 | EVS       |
| 2   | 160312787           | G              | A           | missense         | SER   | ASN      | 247/705          | March7    | 613334 | NL        |
| 2   | 160398902           | G              | A           | missense         | PRO   | LEU      | 1247/1723        | LY75      | 604524 | NL        |
| 4   | 56968604            | C              | G           | missense         | GLY   | ALA      | 55/518           | PPAT      | 172450 | EVS       |
| 4   | 57,045,760          | CA             | del         | indel            | THR   | LYSfs*19 | 355/671          | SRP72     | 602122 | REPORT    |
| 5   | 118530264           | G              | T           | missense         | GLU   | ASP      | 1675/3028        | DMXL1     | 605671 | EVS       |
| 5   | 140210717           | G              | A           | missense         | ARG   | GLN      | 818/843          | PCDHA9    | 606315 | EVS       |
| 5   | 177352572           | G              | A           | missense         | ALA   | VAL      | 142/227          | PROP1     | 601538 | EVS       |
| 6   | 150384904           | A              | G           | missense         | MET   | THR      | 85/247           | RAET1L    | 611047 | EVS       |
| 7   | 5950079             | A              | C           | missense         | PHE   | CYS      | 533/871          | RSPH10B   | na     | NL        |
| 7   | 73850247            | G              | T           | missense         | HIS   | ASN      | 514/950          | GTF2IRD2  | 608899 | EVS       |
| 7   | 74983431            | G              | A           | missense         | ARG   | TRP      | 23/110           | PMS2L3    | na     | NL        |
| 7   | 75964673            | C              | T           | missense         | ARG   | CYS      | 365/623          | DTX2      | 613141 | NL        |
| 7   | 143047878           | C              | T           | missense         | ARG   | TRP      | 265/846          | FAM115C   | na     | NL        |
| 7   | 143048016           | T              | C           | missense         | CYS   | ARG      | 311/846          | FAM115C   | na     | NL        |
| 7   | 151557958           | A              | G           | missense         | TYR   | HIS      | 987/4912         | MLL3      | 606833 | NL        |
| 7   | 151575940           | C              | T           | missense         | GLY   | SER      | 838/4912         | MLL3      | 606833 | NL        |
| 8   | 11452901            | A              | C           | missense         | LYS   | THR      | 325/506          | BLK       | 191305 | EVS       |
| 8   | 17146938            | C              | T           | missense         | ARG   | GLN      | 32/286           | CNOT7     | 604913 | EVS       |
| 9   | 20771801            | A              | G           | missense         | GLN   | ARG      | 357/1802         | KIAA1797  | na     | NL        |
| 9   | 33375852            | C              | T           | missense         | GLY   | ARG      | 180/343          | AQP7      | 602974 | EVS       |
| 9   | 39167397            | G              | A           | missense         | THR   | MET      | 282/1289         | CNTNAP3   | 610517 | EVS       |
| 9   | 67558278            | G              | A           | missense         | ALA   | THR      | 673/824          | ANKRD20A1 | na     | EVS       |
| 9   | 67558296            | C              | T           | missense         | ARG   | CYS      | 679/824          | ANKRD20A1 | na     | DNS       |
| 9   | 68496744            | T              | A           | missense         | GLU   | ASP      | 288/396          | CBWD6     | na     | EVS       |
| 9   | 68713575            | G              | C           | missense         | SER   | THR      | 684/824          | ANKRD20A4 | na     | NL        |
| 9   | 71044679            | C              | T           | missense         | HIS   | TYR      | 788/1191         | TJP2      | 607709 | DNS       |
| 9   | 95137568            | C              | T           | missense         | GLY   | SER      | 92/197           | C9orf129  | na     | NL        |
| 10  | 51135558            | A              | T           | missense         | TYR   | ASN      | 302/664          | CTGLF4    | na     | DNS       |
| 10  | 102047352           | A              | C           | missense         | TRP   | GLY      | 245/806          | PKD2L1    | 604532 | EVS       |
| 10  | 105174891           | G              | A           | missense         | GLY   | ASP      | 975/1872         | PDCD11    | 612333 | NL        |
| 11  | 18224054            | G              | A           | missense         | ALA   | VAL      | 70/123           | SAA2      | 104751 | EVS       |
| 11  | 48303492            | G              | C           | missense         | VAL   | LEU      | 142/330          | OR4C3     | na     | NL        |
| 11  | 48303508            | G              | A           | missense         | ARG   | HIS      | 147/330          | OR4C3     | na     | NL        |
| 11  | 48303537            | A              | T           | missense         | ASN   | TYR      | 157/330          | OR4C3     | na     | NL        |
| 11  | 48303538            | A              | G           | missense         | ASN   | SER      | 157/330          | OR4C3     | na     | NL        |
| 12  | 11397478            | A              | C           | missense         | SER   | ALA      | 276/332          | PRB1      | 180989 | EVS       |
| 12  | 14834818            | G              | A           | missense         | THR   | ILE      | 383/642          | WBP11     | na     | NL        |
| 12  | 121411651           | C              | A           | missense         | LEU   | PHE      | 271/1428         | CLIP1     | 179838 | NL        |
| 13  | 23919263            | T              | C           | missense         | GLN   | ARG      | 1059/1725        | PARP4     | 607519 | NL        |
| 13  | 23919323            | A              | G           | missense         | ILE   | THR      | 1039/1725        | PARP4     | 607519 | NL        |
| 14  | 18448030            | T              | A           | missense         | LEU   | HIS      | 146/327          | OR11H12   | na     | EVS       |
| 15  | 37850100            | C              | T           | missense         | ASP   | ASN      | 44/582           | FSIP1     | na     | EVS       |
| 15  | 38978455            | G              | A           | missense         | ALA   | THR      | 98/974           | VPS18     | 608551 | EVS       |
| 15  | 40226736            | C              | T           | missense         | ALA   | THR      | 433/850          | PLA2G4F   | na     | EVS       |
| 16  | 24712455            | A              | T           | missense         | GLN   | HIS      | 1112/1963        | TNRC6A    | 610739 | NL        |

| Chr | Nucleotide Position | Reference Base | Sample Base | Variation Effect | AA WT | AA Var | Protein Position | Gene            | MIM    | Follow-Up |
|-----|---------------------|----------------|-------------|------------------|-------|--------|------------------|-----------------|--------|-----------|
| 17  | 8099890             | G              | A           | missense         | ARG   | HIS    | 206/1339         | <i>PFAS</i>     | 602133 | NL        |
| 17  | 21259375            | G              | A           | missense         | ARG   | HIS    | 43/434           | <i>KCNJ12</i>   | 602323 | NL        |
| 17  | 21259460            | G              | A           | missense         | MET   | ILE    | 71/434           | <i>KCNJ12</i>   | 602323 | NL        |
| 17  | 21259662            | G              | A           | missense         | GLU   | LYS    | 139/434          | <i>KCNJ12</i>   | 602323 | NL        |
| 17  | 21259680            | G              | A           | missense         | GLY   | SER    | 145/434          | <i>KCNJ12</i>   | 602323 | NL        |
| 17  | 21259764            | G              | A           | missense         | ASP   | ASN    | 173/434          | <i>KCNJ12</i>   | 602323 | NL        |
| 17  | 21259801            | C              | T           | missense         | ALA   | VAL    | 185/434          | <i>KCNJ12</i>   | 602323 | NL        |
| 17  | 21259878            | C              | T           | missense         | LEU   | PHE    | 211/434          | <i>KCNJ12</i>   | 602323 | NL        |
| 17  | 21260136            | G              | A           | missense         | VAL   | ILE    | 297/434          | <i>KCNJ12</i>   | 602323 | NL        |
| 17  | 21260153            | G              | T           | missense         | MET   | ILE    | 302/434          | <i>KCNJ12</i>   | 602323 | NL        |
| 17  | 41981976            | C              | G           | missense         | ASN   | LYS    | 1385/1701        | <i>LRRC37A2</i> | na     | EVS       |
| 17  | 43175021            | A              | C           | missense         | THR   | PRO    | 180/536          | <i>TBX21</i>    | 604895 | NL        |
| 17  | 60322733            | A              | T           | missense         | SER   | THR    | 369/1635         | <i>LRRC37A3</i> | na     | EVS       |
| 19  | 38182406            | T              | C           | missense         | GLN   | ARG    | 384/687          | <i>RHPN2</i>    | 612591 | NL        |
| 19  | 42334762            | C              | T           | missense         | VAL   | ILE    | 572/715          | <i>ZNF585A</i>  | na     | EVS       |
| 19  | 45068502            | G              | C           | missense         | HIS   | GLN    | 3920/5406        | <i>FCGBP</i>    | na     | EVS       |
| 19  | 45084425            | T              | G           | missense         | GLU   | ALA    | 2640/5406        | <i>FCGBP</i>    | na     | EVS       |
| 19  | 54346373            | C              | G           | missense         | GLU   | GLN    | 698/700          | <i>HRC</i>      | 142705 | EVS       |
| 19  | 55985910            | C              | T           | missense         | PRO   | LEU    | 95/427           | <i>ACPT</i>     | 606362 | EVS       |
| 19  | 59563476            | G              | C           | missense         | PRO   | ARG    | 127/288          | <i>LAIR1</i>    | 602992 | EVS       |
| 19  | 61012109            | G              | A           | missense         | THR   | MET    | 560/1034         | <i>NLRP11</i>   | 609664 | NL        |
| 19  | 62338579            | C              | T           | missense         | GLY   | GLU    | 313/473          | <i>ZIM3</i>     | na     | EVS       |
| 19  | 63062058            | T              | C           | missense         | SER   | PRO    | 156/576          | <i>ZNF587</i>   | na     | EVS       |
| 22  | 23445729            | A              | G           | missense         | TYR   | HIS    | 840/883          | <i>PIWIL3</i>   | 610314 | REPORT    |
| X   | 2149200             | T              | C           | missense         | HIS   | ARG    | 292/331          | <i>DHRXS</i>    | na     | X-chr     |
| X   | 2171129             | C              | G           | missense         | VAL   | LEU    | 247/331          | <i>DHRXS</i>    | na     | X-chr     |
| X   | 7772017             | C              | T           | missense         | PRO   | LEU    | 194/207          | <i>VCX</i>      | 300533 | X-chr     |
| X   | 140821571           | C              | T           | missense         | PRO   | SER    | 239/1143         | <i>MAGEC1</i>   | 300223 | X-chr     |
| X   | 153071718           | C              | T           | missense         | ALA   | VAL    | 174/365          | <i>OPN1LW</i>   | 300822 | X-chr     |

Chr – chromosome; AA WT – wild type amino acid. AA var – variant amino acid; Nucleotide position – base affected relative to hg18 build; na – no entry on OMIM; Follow up - the criteria used to follow or exclude this mutation from further analysis: NL – not linked (mutation lies outside the linkage region); EVS – mutation reported on Exome Variant Server database; DNS – mutation does not segregate with disease; REPORT – detailed in this paper.; X-chr – mutation not followed up as on X chromosome.

**Table S2. Primer Sequences Used in this Paper**

| Gene         | Exon/Mutation          | Forward Primer                  | Reverse Primer                  |
|--------------|------------------------|---------------------------------|---------------------------------|
| <i>SRP72</i> | 1                      | GAT CTC TGA TGC TGC CTT AG      | CCG GGC GGA CAA TAG AC          |
| <i>SRP72</i> | 2                      | TAG CTT TCG GAG AGA CAG G       | TTC CAG TTC AGA AAC ATT ATT GAC |
| <i>SRP72</i> | 3                      | GCT AGG GAA GTT GAT ATA TGC     | GGA CTG GTT TGG TGG TCA G       |
| <i>SRP72</i> | 4+5                    | GTG GTT CCA AAA AAG GTT TGC     | TGT CAC TGC ATC AAT AAC TTC C   |
| <i>SRP72</i> | 6 / c.620G>A           | AGC AAA GTG CCA AAG AGC TG      | GGT GGT TTC TAG TGT GAT TCC     |
| <i>SRP72</i> | 7+8                    | TTG TAT CTC TTT TGA ATG TTT GGG | TGT GAT TTT GCT ACA ACT GGA C   |
| <i>SRP72</i> | 9                      | GCT TAG GCA CCC CAA TCA G       | TAC AGG CAT GAG CCA TTG TG      |
| <i>SRP72</i> | 10 /<br>c.1064_1065del | TAC CCT AGG CAG TTC TTT GG      | GTA CAT TTC TGA TTA GTT TTC CC  |
| <i>SRP72</i> | 11                     | GCA CTT ACT TTT AGA GCA TAC C   | TCT AGC TGC ATG TTT GAA ACA G   |
| <i>SRP72</i> | 12                     | GGA AAA GTA GTG GGA GGA AG      | GAA ACC AAT ACC AGA GCA GAG     |
| <i>SRP72</i> | 13                     | ATC AGG TAT TAG CGG AGA GC      | TGA CGT GTA ATA CTT GTT TGC C   |

| <b>Gene</b>     | <b>Exon/Mutation</b> | <b>Forward Primer</b>          | <b>Reverse Primer</b>             |
|-----------------|----------------------|--------------------------------|-----------------------------------|
| <i>SRP72</i>    | 14+15                | CAT AGG TGT ATT TCT TAA AGG TC | AAA AGC TCT GGT CAA AAC ACA G     |
| <i>SRP72</i>    | 16                   | CAG TGT CAA TAG ATA CAT TGG C  | GGT TAA TTT TGG GCT GAG GG        |
| <i>SRP72</i>    | 17                   | CCA TGT TTA TGA TAA GTG CCC    | AAA GAT ACA AGG GAG GGC AG        |
| <i>SRP72</i>    | 18                   | TCC CAG GCT TAG AGA CAT C      | CAA AGA TAC ATC ACA TTT CTC ATA C |
| <i>SRP72</i>    | 19                   | TGT GGG AGA TTG TTA AGT GTG    | GTT CTG TGC TTC TTG CTG TG        |
| <i>PIWIL3</i>   | c.2518T>C            | CAC GAG AGT TAC TGT GTC AG     | TAG AAG CCA GTT CAG AGG TC        |
| <i>RAB3GAP1</i> | c.1268C>G            | TGT AGA ACA AAC TGG CCA ATA C  | GAT CTG CCA TCC AAA ATT CCC       |
